# Supplementary material for: Boosting nanotoxicity to combat multidrug-resistant bacteria in pathophysiological environments
Source: Royal Society of Chemistry journal article supplement (doi:10.1039/d0na00644k), 2020-01-01
Supplement: d0na00644k2.xlsx [file d0na00644k2.xlsx]

## Sheet: List
List of corona proteins identified by LC-MS for Ag and Cu NPs. Exposure time: 15 min, human plasma. Isoelectric point (pI), molecular weight (MW), functional annotation as well as their relative abundance calculated from three technical replicates.

## Sheet: dataset
Accession	Entry	Description	Isoelectric Point	Molecular Weight	Max score	Reported Peptides	Annotation	Ag_NP	Cu_NP
P02768	ALBU_HUMAN	Serum albumin OS Homo sapiens GN ALB PE 1 SV 2	5.86	71362.7	75903.9	75	Other Plasma components	89742.7	78352.5
P02751	FINC_HUMAN	Fibronectin OS Homo sapiens GN FN1 PE 1 SV 4	5.34	266218	48558.1	114	Acute Phase	33378.3	33868.4
P12259	FA5_HUMAN	Coagulation factor V OS Homo sapiens GN F5 PE 1 SV 4	5.62	252844	2724.51	61	Coagulation	20654.1	13498.6
P07996	TSP1_HUMAN	Thrombospondin 1 OS Homo sapiens GN THBS1 PE 1 SV 2	4.53	133375	51303.8	67	Coagulation	15459.6	14346.6
P00736	C1R_HUMAN	Complement C1r subcomponent OS Homo sapiens GN C1R PE 1 SV 2	5.77	81658.4	63567.1	42	Complement system	10444.5	9190.14
P0C0L5	CO4B_HUMAN	Complement C4 B OS Homo sapiens GN C4B PE 1 SV 1	6.72	194333	59024.9	111	Complement system	10771	17000.4
P35579	MYH9_HUMAN	Myosin 9 OS Homo sapiens GN MYH9 PE 1 SV 4	5.34	227787	540.136	5	Tissue Leakage	2801.23	1214.03
P04275	VWF_HUMAN	von Willebrand factor OS Homo sapiens GN VWF PE 1 SV 4	5.14	322609	1976.67	62	Coagulation	17893.3	14056.9
P04114	APOB_HUMAN	Apolipoprotein B 100 OS Homo sapiens GN APOB PE 1 SV 2	6.58	516974	70692.3	385	Lipoproteins	18350.6	18497.6
P08603	CFAH_HUMAN	Complement factor H OS Homo sapiens GN CFH PE 1 SV 4	6.18	143773	82054.2	92	Complement system	29201.2	45003.5
P01024	CO3_HUMAN	Complement C3 OS Homo sapiens GN C3 PE 1 SV 2	5.96	188688	86054.9	149	Complement system	44685	48532.4
P09871	C1S_HUMAN	Complement C1s subcomponent OS Homo sapiens GN C1S PE 1 SV 1	4.66	78224.3	76617.6	32	Complement system	7487.3	6527.1
P0C0L4	CO4A_HUMAN	Complement C4 A OS Homo sapiens GN C4A PE 1 SV 1	6.64	194368	59339.4	111	Complement system	29081.9	21072.1
P02749	APOH_HUMAN	Beta 2 glycoprotein 1 OS Homo sapiens GN APOH PE 1 SV 3	7.87	39609.8	86822.8	19	Lipoproteins	4524.97	8840.56
P07357	CO8A_HUMAN	Complement component C8 alpha chain OS Homo sapiens GN C8A PE 1 SV 2	6.03	66874.1	58462.7	39	Complement system	5548.02	7441.18
P01023	A2MG_HUMAN	Alpha 2 macroglobulin OS Homo sapiens GN A2M PE 1 SV 3	6	164717	20400.2	69	Acute Phase	11859	12849.3
P04003	C4BPA_HUMAN	C4b binding protein alpha chain OS Homo sapiens GN C4BPA PE 1 SV 2	7	69086.2	49790	40	Complement system	5459.54	7306.17
P49747	COMP_HUMAN	Cartilage oligomeric matrix protein OS Homo sapiens GN COMP PE 1 SV 2	4.16	85483.8	9298.96	26	Tissue Leakage	2459.06	5262.31
P00734	THRB_HUMAN	Prothrombin OS Homo sapiens GN F2 PE 1 SV 2	5.53	71519.7	47744.3	42	Coagulation	17036.8	11101.7
P01042	KNG1_HUMAN	Kininogen 1 OS Homo sapiens GN KNG1 PE 1 SV 2	6.34	73041	49069.5	38	Coagulation	9964.97	10090.1
Q86VF7	NRAP_HUMAN	Nebulin related anchoring protein OS Homo sapiens GN NRAP PE 2 SV 2	9.45	198044	2308.79	11	Tissue Leakage	4741.39	6133.01
P02787	TRFE_HUMAN	Serotransferrin OS Homo sapiens GN TF PE 1 SV 3	6.75	79345.1	51732.4	62	Other Plasma components	7481.69	8723.13
P03952	KLKB1_HUMAN	Plasma kallikrein OS Homo sapiens GN KLKB1 PE 1 SV 1	8.1	73479.8	46165.7	51	Coagulation	8044.9	4981.34
Q92954	PRG4_HUMAN	Proteoglycan 4 OS Homo sapiens GN PRG4 PE 1 SV 2	9.9	152332	9632.74	39	Tissue Leakage	7173.56	8801.56
P35749	MYH11_HUMAN	Myosin 11 OS Homo sapiens GN MYH11 PE 1 SV 3	5.25	228195	566.669	5	Tissue Leakage	7702.93	5477.58
P02788	TRFL_HUMAN	Lactotransferrin OS Homo sapiens GN LTF PE 1 SV 6	8.01	80063.9	10177.9	31	Tissue Leakage	4228.97	7059.29
Q13201	MMRN1_HUMAN	Multimerin 1 OS Homo sapiens GN MMRN1 PE 1 SV 3	7.82	139308	3806.85	37	Coagulation	9542.82	5846.95
P04264	K2C1_HUMAN	Keratin type II cytoskeletal 1 OS Homo sapiens GN KRT1 PE 1 SV 6	8.27	66209.9	56839.8	46	Tissue Leakage	7191.56	2154.45
P00747	PLMN_HUMAN	Plasminogen OS Homo sapiens GN PLG PE 1 SV 2	6.91	93306.4	57837.7	54	Coagulation	7029.01	8336.93
P36955	PEDF_HUMAN	Pigment epithelium derived factor OS Homo sapiens GN SERPINF1 PE 1 SV 4	5.94	46483.3	59181.3	24	Other Plasma components	3939.71	3135.7
P19823	ITIH2_HUMAN	Inter alpha trypsin inhibitor heavy chain H2 OS Homo sapiens GN ITIH2 PE 1 SV 2	6.4	106920	14175.2	41	Other Plasma components	4451.79	5747.6
P04004	VTNC_HUMAN	Vitronectin OS Homo sapiens GN VTN PE 1 SV 1	5.43	55104	50466.5	26	Tissue Leakage	9490.8	8030.07
P00748	FA12_HUMAN	Coagulation factor XII OS Homo sapiens GN F12 PE 1 SV 3	7.55	70073.2	29773.4	27	Coagulation	5268.9	7149.44
P02748	CO9_HUMAN	Complement component C9 OS Homo sapiens GN C9 PE 1 SV 2	5.27	64656.2	47033.1	40	Complement system	5427.75	6830.66
Q9BYX2	TBD2A_HUMAN	TBC1 domain family member 2A OS Homo sapiens GN TBC1D2 PE 1 SV 3	6.13	106326	740.712	4	Tissue Leakage	2939.27	4314.39
P00751	CFAB_HUMAN	Complement factor B OS Homo sapiens GN CFB PE 1 SV 2	6.66	86901.6	52174.9	42	Complement system	8148.91	11559.9
P00450	CERU_HUMAN	Ceruloplasmin OS Homo sapiens GN CP PE 1 SV 1	5.34	123061	7519.67	45	Acute Phase	4177.08	6443.84
P12036	NFH_HUMAN	Neurofilament heavy polypeptide OS Homo sapiens GN NEFH PE 1 SV 4	5.87	112707	595.773	5	Tissue Leakage	2993.67	3504.32
P06681	CO2_HUMAN	Complement C2 OS Homo sapiens GN C2 PE 1 SV 2	7.12	84636.6	9584.52	35	Complement system	1975.37	3502.59
P10909	CLUS_HUMAN	Clusterin OS Homo sapiens GN CLU PE 1 SV 1	5.84	53065	30791.5	21	Lipoproteins	6923.8	3615.67
P01860	IGHG3_HUMAN	Ig gamma 3 chain C region OS Homo sapiens GN IGHG3 PE 1 SV 2	7.79	42313.5	60052.5	15	Immunoglobulins	5334.96	4039.2
P10643	CO7_HUMAN	Complement component C7 OS Homo sapiens GN C7 PE 1 SV 2	6.05	96711.9	8530.22	36	Complement system	6629.04	1991.89
P01876	IGHA1_HUMAN	Ig alpha 1 chain C region OS Homo sapiens GN IGHA1 PE 1 SV 2	6.06	38510.1	60396.3	18	Immunoglobulins	4889.94	5446.8
P07225	PROS_HUMAN	Vitamin K dependent protein S OS Homo sapiens GN PROS1 PE 1 SV 1	5.34	77175.7	14547.5	33	Coagulation	3143.58	2710.92
P29622	KAIN_HUMAN	Kallistatin OS Homo sapiens GN SERPINA4 PE 1 SV 3	7.56	48713.1	22268.1	20	Coagulation	4746.72	5442.27
P0CG39	POTEJ_HUMAN	POTE ankyrin domain family member J OS Homo sapiens GN POTEJ PE 3 SV 1	5.57	118816	2475.49	14	Tissue Leakage	1745.54	1936.16
P19827	ITIH1_HUMAN	Inter alpha trypsin inhibitor heavy chain H1 OS Homo sapiens GN ITIH1 PE 1 SV 3	6.31	101846	18214.9	25	Other Plasma components	2774.7	3220.61
Q3MJ40	C144B_HUMAN	Coiled coil domain containing protein 144B OS Homo sapiens GN CCDC144B PE 2 SV 1	4.74	83749.7	323.573	2	Tissue Leakage	2371.31	1158.56
P02671	FIBA_HUMAN	Fibrinogen alpha chain OS Homo sapiens GN FGA PE 1 SV 2	5.61	95714.5	6613.09	32	Coagulation	5032.3	8084.24
P01861	IGHG4_HUMAN	Ig gamma 4 chain C region OS Homo sapiens GN IGHG4 PE 1 SV 1	7.11	36453.8	64117.7	16	Immunoglobulins	4284.71	7195.98
P06733	ENOA_HUMAN	Alpha enolase OS Homo sapiens GN ENO1 PE 1 SV 2	7.17	47511.2	37526.3	16	Tissue Leakage	2775.29	1301.24
P23142	FBLN1_HUMAN	Fibulin 1 OS Homo sapiens GN FBLN1 PE 1 SV 4	4.9	81320.1	21234.5	33	Coagulation	2788.86	2582.21
Q15113	PCOC1_HUMAN	Procollagen C endopeptidase enhancer 1 OS Homo sapiens GN PCOLCE PE 1 SV 2	7.27	48828	18109.6	17	Tissue Leakage	2845.52	1718.43
P02747	C1QC_HUMAN	Complement C1q subcomponent subunit C OS Homo sapiens GN C1QC PE 1 SV 3	8.54	26001.8	44442.9	5	Complement system	3494.11	3543.94
P19012	K1C15_HUMAN	Keratin type I cytoskeletal 15 OS Homo sapiens GN KRT15 PE 1 SV 3	4.51	49439.9	6819.49	21	Tissue Leakage	4658.24	3450.92
P01008	ANT3_HUMAN	Antithrombin III OS Homo sapiens GN SERPINC1 PE 1 SV 1	6.3	53058.8	46334.9	37	Coagulation	6468.74	2286.18
P36980	FHR2_HUMAN	Complement factor H related protein 2 OS Homo sapiens GN CFHR2 PE 1 SV 1	5.96	31563.2	35621.1	16	Complement system	1492.43	1297.04
P00738	HPT_HUMAN	Haptoglobin OS Homo sapiens GN HP PE 1 SV 1	6.12	45889.7	40102.7	29	Acute Phase	4000.33	3488.69
P04220	MUCB_HUMAN	Ig mu heavy chain disease protein OS Homo sapiens PE 1 SV 1	4.95	43570.6	44458.9	17	Immunoglobulins	144.977	856.441
P18428	LBP_HUMAN	Lipopolysaccharide binding protein OS Homo sapiens GN LBP PE 1 SV 3	6.24	53554.8	14220.7	17	Acute Phase	1941.84	1941.09
P02746	C1QB_HUMAN	Complement C1q subcomponent subunit B OS Homo sapiens GN C1QB PE 1 SV 3	8.85	26949.9	38434.6	12	Complement system	2943.72	2648.38
P04259	K2C6B_HUMAN	Keratin type II cytoskeletal 6B OS Homo sapiens GN KRT6B PE 1 SV 5	8.05	60352.2	56506.9	49	Tissue Leakage	1981.08	1092.92
P20742	PZP_HUMAN	Pregnancy zone protein OS Homo sapiens GN PZP PE 1 SV 4	5.93	165346	2313.39	29	Other Plasma components	4338.49	4745.19
P13671	CO6_HUMAN	Complement component C6 OS Homo sapiens GN C6 PE 1 SV 3	6.34	108436	14012.5	42	Complement system	3093.7	5061.18
P35858	ALS_HUMAN	Insulin like growth factor binding protein complex acid labile subunit OS Homo sapiens GN IGFALS PE	6.33	66776.4	23590.2	26	Other Plasma components	3033.31	3806.82
P26927	HGFL_HUMAN	Hepatocyte growth factor like protein OS Homo sapiens GN MST1 PE 1 SV 2	7.49	82886.2	1512.26	31	Tissue Leakage	3559.22	5529.95
P35442	TSP2_HUMAN	Thrombospondin 2 OS Homo sapiens GN THBS2 PE 1 SV 2	4.43	133869	4226.44	11	Coagulation	2082.73	3372.13
Q01546	K22O_HUMAN	Keratin type II cytoskeletal 2 oral OS Homo sapiens GN KRT76 PE 1 SV 2	8.1	66411.1	8092.07	18	Tissue Leakage	768.164	2271.63
P25311	ZA2G_HUMAN	Zinc alpha 2 glycoprotein OS Homo sapiens GN AZGP1 PE 1 SV 2	5.64	34486.9	4856.77	19	Other Plasma components	2871.08	1948.07
P27169	PON1_HUMAN	Serum paraoxonase arylesterase 1 OS Homo sapiens GN PON1 PE 1 SV 3	4.92	39902.4	56349.4	18	Lipoproteins	9075.43	6137.42
Q14520	HABP2_HUMAN	Hyaluronan binding protein 2 OS Homo sapiens GN HABP2 PE 1 SV 1	6.08	64781.8	18012.2	25	Coagulation	3707.04	4768.93
P00740	FA9_HUMAN	Coagulation factor IX OS Homo sapiens GN F9 PE 1 SV 2	5.19	53147.1	1798.5	16	Coagulation	1412.63	1595.12
P02743	SAMP_HUMAN	Serum amyloid P component OS Homo sapiens GN APCS PE 1 SV 2	6.1	25501.2	43143.5	12	Acute Phase	2960.15	3661.77
Q9UK55	ZPI_HUMAN	Protein Z dependent protease inhibitor OS Homo sapiens GN SERPINA10 PE 1 SV 1	8.55	50821.2	2788.98	20	Other Plasma components	2375.55	2971.12
P06727	APOA4_HUMAN	Apolipoprotein A IV OS Homo sapiens GN APOA4 PE 1 SV 3	5.11	45399.1	34177.2	42	Lipoproteins	6260.54	7167.22
P00742	FA10_HUMAN	Coagulation factor X OS Homo sapiens GN F10 PE 1 SV 2	5.58	56100.4	7189.71	25	Coagulation	2659.17	1287.76
Q7Z794	K2C1B_HUMAN	Keratin type II cytoskeletal 1b OS Homo sapiens GN KRT77 PE 1 SV 3	5.63	62186.6	3152.5	29	Tissue Leakage	1588.2	1609.31
P48740	MASP1_HUMAN	Mannan binding lectin serine protease 1 OS Homo sapiens GN MASP1 PE 1 SV 3	5.15	80900.6	2816.13	25	Complement system	1770.23	1396.23
P02775	CXCL7_HUMAN	Platelet basic protein OS Homo sapiens GN PPBP PE 1 SV 3	9.07	14179.4	70048.2	8	Acute Phase	616.123	757.171
P08107	HSP71_HUMAN	Heat shock 70 kDa protein 1A 1B OS Homo sapiens GN HSPA1A PE 1 SV 5	5.32	70337.5	13885.1	12	Tissue Leakage	1161.87	277.03
P02790	HEMO_HUMAN	Hemopexin OS Homo sapiens GN HPX PE 1 SV 2	6.57	52417.8	25975.7	26	Other Plasma components	2274.57	3041.17
Q04756	HGFA_HUMAN	Hepatocyte growth factor activator OS Homo sapiens GN HGFAC PE 1 SV 1	6.89	72905.9	15841.5	15	Tissue Leakage	1602.04	1143.61
Q9NZP8	C1RL_HUMAN	Complement C1r subcomponent like protein OS Homo sapiens GN C1RL PE 1 SV 2	6.78	54239.8	2992.3	6	Complement system	1233.19	2053.3
P02774	VTDB_HUMAN	Vitamin D binding protein OS Homo sapiens GN GC PE 1 SV 1	5.24	54560.5	10567.6	26	Other Plasma components	1790.89	1233.09
P12814	ACTN1_HUMAN	Alpha actinin 1 OS Homo sapiens GN ACTN1 PE 1 SV 2	5.09	103628	1775.69	23	Tissue Leakage	2507.2	2408.09
Q9BXR6	FHR5_HUMAN	Complement factor H related protein 5 OS Homo sapiens GN CFHR5 PE 1 SV 1	6.73	66472.5	12233.4	34	Complement system	2017.04	4394.45
P11021	GRP78_HUMAN	78 kDa glucose regulated protein OS Homo sapiens GN HSPA5 PE 1 SV 2	4.87	72447.1	3916.36	15	Tissue Leakage	1518.91	1383.6
O43866	CD5L_HUMAN	CD5 antigen like OS Homo sapiens GN CD5L PE 1 SV 1	5.14	39627.6	9842.18	20	Tissue Leakage	850.761	1090.91
P05156	CFAI_HUMAN	Complement factor I OS Homo sapiens GN CFI PE 1 SV 2	7.31	68145.5	8843.78	25	Complement system	3516.75	2888.23
P63261	ACTG_HUMAN	Actin cytoplasmic 2 OS Homo sapiens GN ACTG1 PE 1 SV 1	5.16	42135.1	45230.6	19	Tissue Leakage	2033.82	1055.3
P03951	FA11_HUMAN	Coagulation factor XI OS Homo sapiens GN F11 PE 1 SV 1	7.97	72162.2	17651.7	37	Coagulation	2092.83	1275.36
P02745	C1QA_HUMAN	Complement C1q subcomponent subunit A OS Homo sapiens GN C1QA PE 1 SV 2	9.39	26301.7	48325.7	8	Complement system	1368.32	1213.11
Q16610	ECM1_HUMAN	Extracellular matrix protein 1 OS Homo sapiens GN ECM1 PE 1 SV 2	6.24	62270.9	3497.18	19	Tissue Leakage	784.419	911.657
P20851	C4BPB_HUMAN	C4b binding protein beta chain OS Homo sapiens GN C4BPB PE 1 SV 1	4.87	29327	19237.7	12	Complement system	597.192	544.599
Q5XKE5	K2C79_HUMAN	Keratin type II cytoskeletal 79 OS Homo sapiens GN KRT79 PE 1 SV 2	6.83	58120.8	8298.96	13	Tissue Leakage	818.005	568.382
P02765	FETUA_HUMAN	Alpha 2 HS glycoprotein OS Homo sapiens GN AHSG PE 1 SV 1	5.33	40123.1	31194.7	14	Other Plasma components	2456.02	1097.21
A1L4H1	SRCRL_HUMAN	Soluble scavenger receptor cysteine rich domain containing protein SSC5D OS Homo sapiens GN SSC5D PE	5.67	168195	840.463	10	Tissue Leakage	0	1737.56
P01011	AACT_HUMAN	Alpha 1 antichymotrypsin OS Homo sapiens GN SERPINA3 PE 1 SV 2	5.18	47822.1	17629.6	14	Acute Phase	1378.73	1168.01
P00488	F13A_HUMAN	Coagulation factor XIII A chain OS Homo sapiens GN F13A1 PE 1 SV 4	5.67	83780.7	2502.98	18	Coagulation	929.458	976.008
P49908	SEPP1_HUMAN	Selenoprotein P OS Homo sapiens GN SEPP1 PE 1 SV 3	7.72	42642.8	10349.1	12	Other Plasma components	1359	2037.2
O94985	CSTN1_HUMAN	Calsyntenin 1 OS Homo sapiens GN CLSTN1 PE 1 SV 1	4.63	111047	357.564	5	Tissue Leakage	496.154	828.551
Q9UHG3	PCYOX_HUMAN	Prenylcysteine oxidase 1 OS Homo sapiens GN PCYOX1 PE 1 SV 3	5.75	57039.5	4978.55	17	Tissue Leakage	2213.77	2186.35
P01857	IGHG1_HUMAN	Ig gamma 1 chain C region OS Homo sapiens GN IGHG1 PE 1 SV 1	8.18	36619.2	73326.1	18	Immunoglobulins	2541.55	4905.3
P02763	A1AG1_HUMAN	Alpha 1 acid glycoprotein 1 OS Homo sapiens GN ORM1 PE 1 SV 1	4.74	23739.7	25244.7	14	Acute Phase	954.587	1045.3
P61626	LYSC_HUMAN	Lysozyme C OS Homo sapiens GN LYZ PE 1 SV 1	9.33	16993.3	11160.3	10	Other Plasma components	2133.39	2519.24
P13929	ENOB_HUMAN	Beta enolase OS Homo sapiens GN ENO3 PE 1 SV 4	7.66	47274	15264.4	5	Tissue Leakage	507.801	869.355
P01766	HV305_HUMAN	Ig heavy chain V III region BRO OS Homo sapiens PE 1 SV 1	6.5	13340.8	55682.5	4	Immunoglobulins	884.464	1084.82
P05546	HEP2_HUMAN	Heparin cofactor 2 OS Homo sapiens GN SERPIND1 PE 1 SV 3	6.43	57241.8	3110.12	19	Coagulation	964.179	560.942
Q03591	FHR1_HUMAN	Complement factor H related protein 1 OS Homo sapiens GN CFHR1 PE 1 SV 2	7.19	38791.2	40624.8	20	Complement system	1204.38	1871.51
P04180	LCAT_HUMAN	Phosphatidylcholine sterol acyltransferase OS Homo sapiens GN LCAT PE 1 SV 1	5.66	49920.2	1388.64	6	Lipoproteins	2583.36	1989.21
P17936	IBP3_HUMAN	Insulin like growth factor binding protein 3 OS Homo sapiens GN IGFBP3 PE 1 SV 2	8.66	32700.7	7927.08	12	Other Plasma components	494.767	676.771
Q14766	LTBP1_HUMAN	Latent transforming growth factor beta binding protein 1 OS Homo sapiens GN LTBP1 PE 1 SV 4	5.55	195236	730.027	9	Tissue Leakage	593.092	370.887
P05090	APOD_HUMAN	Apolipoprotein D OS Homo sapiens GN APOD PE 1 SV 1	4.87	21560.7	30946.2	11	Lipoproteins	2783.55	2006.77
P81605	DCD_HUMAN	Dermcidin OS Homo sapiens GN DCD PE 1 SV 2	6.11	11397.9	9063.57	6	Tissue Leakage	917.639	729.02
P18206	VINC_HUMAN	Vinculin OS Homo sapiens GN VCL PE 1 SV 4	5.35	124370	733.511	25	Tissue Leakage	2672.13	1435.95
Q13103	SPP24_HUMAN	Secreted phosphoprotein 24 OS Homo sapiens GN SPP2 PE 1 SV 1	8.39	24622.9	13948.9	9	Other Plasma components	1829.73	210.175
Q15582	BGH3_HUMAN	Transforming growth factor beta induced protein ig h3 OS Homo sapiens GN TGFBI PE 1 SV 1	7.52	75308.3	1631.54	13	Tissue Leakage	603.076	785.991
O43707	ACTN4_HUMAN	Alpha actinin 4 OS Homo sapiens GN ACTN4 PE 1 SV 2	5.12	105310	2859.88	14	Tissue Leakage	942.328	2460.01
P35443	TSP4_HUMAN	Thrombospondin 4 OS Homo sapiens GN THBS4 PE 1 SV 2	4.25	108550	2542.86	7	Coagulation	381.822	2034.38
P60709	ACTB_HUMAN	Actin cytoplasmic 1 OS Homo sapiens GN ACTB PE 1 SV 1	5.14	42079	45271.2	19	Tissue Leakage	1015.47	321.425
P04217	A1BG_HUMAN	Alpha 1B glycoprotein OS Homo sapiens GN A1BG PE 1 SV 4	5.48	54823.8	5488.73	11	Other Plasma components	905.018	859.418
P01859	IGHG2_HUMAN	Ig gamma 2 chain C region OS Homo sapiens GN IGHG2 PE 1 SV 2	7.44	36528	49357.5	12	Immunoglobulins	872.749	1970.3
P05067	A4_HUMAN	Amyloid beta A4 protein OS Homo sapiens GN APP PE 1 SV 3	4.54	87969.9	836.802	5	Tissue Leakage	311.432	193.255
P04406	G3P_HUMAN	Glyceraldehyde 3 phosphate dehydrogenase OS Homo sapiens GN GAPDH PE 1 SV 3	8.7	36224.4	39298.4	13	Tissue Leakage	652.079	293.097
O95445	APOM_HUMAN	Apolipoprotein M OS Homo sapiens GN APOM PE 1 SV 2	5.6	21595.5	12164.3	13	Lipoproteins	1512.82	1206.19
P01591	IGJ_HUMAN	Immunoglobulin J chain OS Homo sapiens GN IGJ PE 1 SV 4	4.91	18554.8	20735.3	8	Immunoglobulins	383.132	370.914
Q2M2I5	K1C24_HUMAN	Keratin type I cytoskeletal 24 OS Homo sapiens GN KRT24 PE 1 SV 1	4.69	55600.7	3041.94	13	Tissue Leakage	980.832	471.131
P02776	PLF4_HUMAN	Platelet factor 4 OS Homo sapiens GN PF4 PE 1 SV 2	8.78	11130.1	49985.4	8	Coagulation	1264.48	797.388
P01019	ANGT_HUMAN	Angiotensinogen OS Homo sapiens GN AGT PE 1 SV 1	5.85	53439.4	4113.86	10	Other Plasma components	833.835	713.03
P05154	IPSP_HUMAN	Plasma serine protease inhibitor OS Homo sapiens GN SERPINA5 PE 1 SV 3	9.61	45788.8	4584.11	11	Coagulation	363.009	163.593
P01617	KV204_HUMAN	Ig kappa chain V II region TEW OS Homo sapiens PE 1 SV 1	5.59	12172.7	37097.4	5	Immunoglobulins	111.136	362.713
P00746	CFAD_HUMAN	Complement factor D OS Homo sapiens GN CFD PE 1 SV 5	7.55	27546.2	24685	10	Complement system	414.612	457.835
P01877	IGHA2_HUMAN	Ig alpha 2 chain C region OS Homo sapiens GN IGHA2 PE 1 SV 3	5.66	37324.7	41263.9	13	Immunoglobulins	623.477	444.963
P02655	APOC2_HUMAN	Apolipoprotein C II OS Homo sapiens GN APOC2 PE 1 SV 1	4.44	11283.9	81117.9	8	Lipoproteins	986.415	324.47
P02654	APOC1_HUMAN	Apolipoprotein C I OS Homo sapiens GN APOC1 PE 1 SV 1	9.4	9331.94	54543.9	8	Lipoproteins	660.341	1001.56
Q96PD5	PGRP2_HUMAN	N acetylmuramoyl L alanine amidase OS Homo sapiens GN PGLYRP2 PE 1 SV 1	7.27	62787.4	4145.48	11	Tissue Leakage	239.225	471.605
P35900	K1C20_HUMAN	Keratin type I cytoskeletal 20 OS Homo sapiens GN KRT20 PE 1 SV 1	5.39	48543.7	1892.08	6	Tissue Leakage	281.257	139.244
P69905	HBA_HUMAN	Hemoglobin subunit alpha OS Homo sapiens GN HBA1 PE 1 SV 2	9.18	15314.6	22277.3	5	Other Plasma components	1115.61	244.984
P68366	TBA4A_HUMAN	Tubulin alpha 4A chain OS Homo sapiens GN TUBA4A PE 1 SV 1	4.75	50665.8	22337.2	9	Tissue Leakage	726.03	1176.07
P22792	CPN2_HUMAN	Carboxypeptidase N subunit 2 OS Homo sapiens GN CPN2 PE 1 SV 3	5.57	61412.1	1554.89	6	Other Plasma components	719.24	981.42
A5A3E0	POTEF_HUMAN	POTE ankyrin domain family member F OS Homo sapiens GN POTEF PE 1 SV 2	5.77	123099	4761.34	13	Tissue Leakage	333.491	533.581
P05783	K1C18_HUMAN	Keratin type I cytoskeletal 18 OS Homo sapiens GN KRT18 PE 1 SV 2	5.17	48057.9	1383.28	4	Tissue Leakage	227.093	579.486
P04070	PROC_HUMAN	Vitamin K dependent protein C OS Homo sapiens GN PROC PE 1 SV 1	5.82	53440	2429.67	8	Coagulation	1030.16	376.13
P80748	LV302_HUMAN	Ig lambda chain V III region LOI OS Homo sapiens PE 1 SV 1	4.76	12049.2	22112.4	4	Immunoglobulins	242.391	498.657
Q96IY4	CBPB2_HUMAN	Carboxypeptidase B2 OS Homo sapiens GN CPB2 PE 1 SV 2	7.53	48994.6	1833.54	8	Tissue Leakage	481.107	714.766
P62937	PPIA_HUMAN	Peptidyl prolyl cis trans isomerase A OS Homo sapiens GN PPIA PE 1 SV 2	7.85	18240.6	18110.6	5	Tissue Leakage	213.373	180.712
P02675	FIBB_HUMAN	Fibrinogen beta chain OS Homo sapiens GN FGB PE 1 SV 2	8.25	56612.6	1762.68	9	Coagulation	552.58	350.704
Q7Z3Y9	K1C26_HUMAN	Keratin type I cytoskeletal 26 OS Homo sapiens GN KRT26 PE 1 SV 2	4.67	52652.1	1228.14	2	Tissue Leakage	643.121	169.327
P01764	HV303_HUMAN	Ig heavy chain V III region VH26 OS Homo sapiens PE 1 SV 1	8.46	12753.4	57851.4	5	Immunoglobulins	365.672	727.908
P23528	COF1_HUMAN	Cofilin 1 OS Homo sapiens GN CFL1 PE 1 SV 3	8.22	18730.6	14259.3	11	Tissue Leakage	688.191	605.223
P02730	B3AT_HUMAN	Band 3 anion transport protein OS Homo sapiens GN SLC4A1 PE 1 SV 3	4.9	102078	1734.94	7	Tissue Leakage	733.947	0
O00187	MASP2_HUMAN	Mannan binding lectin serine protease 2 OS Homo sapiens GN MASP2 PE 1 SV 4	5.27	77242.2	551.106	4	Complement system	156.631	171.695
Q02985	FHR3_HUMAN	Complement factor H related protein 3 OS Homo sapiens GN CFHR3 PE 1 SV 2	7.39	38520.9	11153.3	9	Complement system	420.556	390.719
P80108	PHLD_HUMAN	Phosphatidylinositol glycan specific phospholipase D OS Homo sapiens GN GPLD1 PE 1 SV 3	5.89	92963.9	371.676	5	Tissue Leakage	649.808	190.564
P02741	CRP_HUMAN	C reactive protein OS Homo sapiens GN CRP PE 1 SV 1	5.31	25209.7	15485.1	8	Acute Phase	727.294	347.033
Q13790	APOF_HUMAN	Apolipoprotein F OS Homo sapiens GN APOF PE 1 SV 2	5.29	35741.7	8989.36	4	Lipoproteins	2068.51	1287.06
P02656	APOC3_HUMAN	Apolipoprotein C III OS Homo sapiens GN APOC3 PE 1 SV 1	5.05	10852.3	80210.6	6	Lipoproteins	590.061	425.92
O75636	FCN3_HUMAN	Ficolin 3 OS Homo sapiens GN FCN3 PE 1 SV 2	6.21	33416.3	799.79	2	Complement system	210.817	216.509
P35542	SAA4_HUMAN	Serum amyloid A 4 protein OS Homo sapiens GN SAA4 PE 1 SV 2	9.38	14860.7	34696.6	9	Acute Phase	1291.36	1116.69
Q01518	CAP1_HUMAN	Adenylyl cyclase associated protein 1 OS Homo sapiens GN CAP1 PE 1 SV 5	8.06	52357.8	2755.73	5	Tissue Leakage	271.237	573.801
P04208	LV106_HUMAN	Ig lambda chain V I region WAH OS Homo sapiens PE 1 SV 1	6.45	11839	15514.1	3	Immunoglobulins	215.534	476.275
P63104	1433Z_HUMAN	14 3 3 protein zeta delta OS Homo sapiens GN YWHAZ PE 1 SV 1	4.53	27916.2	41792.4	12	Tissue Leakage	753.437	472.814
P27105	STOM_HUMAN	Erythrocyte band 7 integral membrane protein OS Homo sapiens GN STOM PE 1 SV 3	7.99	31901.9	1562.84	6	Tissue Leakage	327.821	129.615
Q8WXW3	PIBF1_HUMAN	Progesterone induced blocking factor 1 OS Homo sapiens GN PIBF1 PE 2 SV 2	5.68	90089.9	708.878	6	Tissue Leakage	1005.46	1118.68
P02766	TTHY_HUMAN	Transthyretin OS Homo sapiens GN TTR PE 1 SV 1	5.4	16001.1	20699.9	9	Other Plasma components	268.686	205.758
P02679	FIBG_HUMAN	Fibrinogen gamma chain OS Homo sapiens GN FGG PE 1 SV 3	5.24	52139	1337.56	6	Coagulation	259.874	262.218
P01034	CYTC_HUMAN	Cystatin C OS Homo sapiens GN CST3 PE 1 SV 1	8.99	16027.4	5647.89	8	Other Plasma components	557.435	756.572
P01620	KV302_HUMAN	Ig kappa chain V III region SIE OS Homo sapiens PE 1 SV 1	8.79	11889.1	86345.3	5	Immunoglobulins	230.382	359.268
P01781	HV320_HUMAN	Ig heavy chain V III region GAL OS Homo sapiens PE 1 SV 1	8.81	11885.4	17544.8	4	Immunoglobulins	178.698	224.359
P19013	K2C4_HUMAN	Keratin type II cytoskeletal 4 OS Homo sapiens GN KRT4 PE 1 SV 4	6.22	57684.5	8711.23	7	Tissue Leakage	545.54	1045.79
P11226	MBL2_HUMAN	Mannose binding protein C OS Homo sapiens GN MBL2 PE 1 SV 2	5.21	26542.8	2827.23	7	Complement system	159.894	195.536
P06331	HV209_HUMAN	Ig heavy chain V II region ARH 77 OS Homo sapiens PE 4 SV 1	8.44	16399.6	25176	2	Immunoglobulins	319.308	290.271
Q15485	FCN2_HUMAN	Ficolin 2 OS Homo sapiens GN FCN2 PE 1 SV 2	6.33	34457.4	2132.26	5	Complement system	441.918	109.901
P01616	KV203_HUMAN	Ig kappa chain V II region MIL OS Homo sapiens PE 1 SV 1	9.57	10939.5	5250.04	3	Immunoglobulins	227.67	142.55
P11142	HSP7C_HUMAN	Heat shock cognate 71 kDa protein OS Homo sapiens GN HSPA8 PE 1 SV 1	5.2	71126.3	12651.7	13	Tissue Leakage	675.627	385.311
P18065	IBP2_HUMAN	Insulin like growth factor binding protein 2 OS Homo sapiens GN IGFBP2 PE 1 SV 2	7.28	35897.7	7492.3	12	Other Plasma components	283.295	301.376
P55058	PLTP_HUMAN	Phospholipid transfer protein OS Homo sapiens GN PLTP PE 1 SV 1	6.57	54967.7	1248.98	10	Lipoproteins	588.817	434.956
P01763	HV302_HUMAN	Ig heavy chain V III region WEA OS Homo sapiens PE 1 SV 1	8.82	12255.7	15523.9	3	Immunoglobulins	106.919	163.702
P01825	HV207_HUMAN	Ig heavy chain V II region NEWM OS Homo sapiens PE 1 SV 1	6.92	12961.4	24581	3	Immunoglobulins	120.924	199.671
P14618	KPYM_HUMAN	Pyruvate kinase isozymes M1 M2 OS Homo sapiens GN PKM2 PE 1 SV 4	7.75	58507.3	14976.8	14	Tissue Leakage	859.788	754.642
P27918	PROP_HUMAN	Properdin OS Homo sapiens GN CFP PE 1 SV 2	7.75	53785.6	12711.8	14	Complement system	653.094	1380.75
P67936	TPM4_HUMAN	Tropomyosin alpha 4 chain OS Homo sapiens GN TPM4 PE 1 SV 3	4.47	28635.9	3165.77	2	Tissue Leakage	105.061	244.375
P01602	KV110_HUMAN	Ig kappa chain V I region HK102 Fragment OS Homo sapiens GN IGKV1 5 PE 4 SV 1	6.36	12939.6	25951.4	3	Immunoglobulins	119.85	469.094
Q9NQ79	CRAC1_HUMAN	Cartilage acidic protein 1 OS Homo sapiens GN CRTAC1 PE 1 SV 2	4.77	72219.2	958.905	3	Tissue Leakage	135.612	287.926
P15169	CBPN_HUMAN	Carboxypeptidase N catalytic chain OS Homo sapiens GN CPN1 PE 1 SV 1	6.92	52571.4	6736.31	15	Tissue Leakage	222.498	338.04
Q7Z3Y7	K1C28_HUMAN	Keratin type I cytoskeletal 28 OS Homo sapiens GN KRT28 PE 1 SV 2	5.18	51194.8	2810.59	4	Tissue Leakage	172.53	50.9405
P06312	KV401_HUMAN	Ig kappa chain V IV region Fragment OS Homo sapiens GN IGKV4 1 PE 4 SV 1	4.88	13494.1	38131.2	3	Immunoglobulins	89.0957	264.79
A8MT79	ZAGL1_HUMAN	Putative zinc alpha 2 glycoprotein like 1 OS Homo sapiens PE 5 SV 2	5.83	23093.9	1863.46	3	Tissue Leakage	132.122	112.264
P01767	HV306_HUMAN	Ig heavy chain V III region BUT OS Homo sapiens PE 1 SV 1	9.5	12020.5	15886.1	2	Immunoglobulins	79.7202	122.793
P01743	HV102_HUMAN	Ig heavy chain V I region HG3 OS Homo sapiens PE 4 SV 1	9.18	13116.8	16324.2	4	Immunoglobulins	163.552	286.741
P19652	A1AG2_HUMAN	Alpha 1 acid glycoprotein 2 OS Homo sapiens GN ORM2 PE 1 SV 2	4.84	23887.8	15800.3	9	Acute Phase	185.564	170.256
P01702	LV104_HUMAN	Ig lambda chain V I region NIG 64 OS Homo sapiens PE 1 SV 1	4.45	11567.7	3625.4	2	Immunoglobulins	246.264	337.963
P11597	CETP_HUMAN	Cholesteryl ester transfer protein OS Homo sapiens GN CETP PE 1 SV 2	5.65	55155.5	751.394	2	Other Plasma components	505.682	198.542
P08709	FA7_HUMAN	Coagulation factor VII OS Homo sapiens GN F7 PE 1 SV 1	6.87	53076.6	468.486	2	Coagulation	237.483	149.335
P01714	LV301_HUMAN	Ig lambda chain V III region SH OS Homo sapiens PE 1 SV 1	6.07	11506.6	35638.8	3	Immunoglobulins	153.362	328.699
P01779	HV318_HUMAN	Ig heavy chain V III region TUR OS Homo sapiens PE 1 SV 1	10.03	12301.9	33516.9	3	Immunoglobulins	67.4086	199.007
P63267	ACTH_HUMAN	Actin gamma enteric smooth muscle OS Homo sapiens GN ACTG2 PE 1 SV 1	5.16	42276.2	16165	10	Tissue Leakage	539.83	33.5632
P01700	LV102_HUMAN	Ig lambda chain V I region HA OS Homo sapiens PE 1 SV 1	9.21	12010.2	15904.3	3	Immunoglobulins	95.5446	130.134
O76014	KRT37_HUMAN	Keratin type I cuticular Ha7 OS Homo sapiens GN KRT37 PE 2 SV 3	4.71	51115.9	1020.83	4	Tissue Leakage	89.1021	384.795
P55056	APOC4_HUMAN	Apolipoprotein C IV OS Homo sapiens GN APOC4 PE 1 SV 1	9.14	14895.2	14702.5	9	Lipoproteins	566.195	337.473
Q9Y5C1	ANGL3_HUMAN	Angiopoietin related protein 3 OS Homo sapiens GN ANGPTL3 PE 1 SV 1	6.34	53865.6	1014.16	3	Other Plasma components	248.841	115.427
P10720	PF4V_HUMAN	Platelet factor 4 variant OS Homo sapiens GN PF4V1 PE 1 SV 1	9.49	11780.8	37595	5	Other Plasma components	174.111	96.9444
P01598	KV106_HUMAN	Ig kappa chain V I region EU OS Homo sapiens PE 1 SV 1	8.78	11902.3	36610.6	3	Immunoglobulins	110.242	83.0469
P22352	GPX3_HUMAN	Glutathione peroxidase 3 OS Homo sapiens GN GPX3 PE 1 SV 2	8.22	25630.5	1695.62	3	Tissue Leakage	141.811	71.9322
P07737	PROF1_HUMAN	Profilin 1 OS Homo sapiens GN PFN1 PE 1 SV 2	8.46	15225.3	4261.78	4	Tissue Leakage	105.385	186.191
P37837	TALDO_HUMAN	Transaldolase OS Homo sapiens GN TALDO1 PE 1 SV 2	6.37	37711.3	942.633	2	Tissue Leakage	74.2509	90.2159
P06311	KV311_HUMAN	Ig kappa chain V III region IARC BL41 OS Homo sapiens PE 1 SV 1	6.58	14183.9	13322.3	5	Immunoglobulins	86.7436	200.925
P04075	ALDOA_HUMAN	Fructose bisphosphate aldolase A OS Homo sapiens GN ALDOA PE 1 SV 2	8.06	39876.3	3984.16	4	Tissue Leakage	183.555	105.908
P01610	KV118_HUMAN	Ig kappa chain V I region WEA OS Homo sapiens PE 1 SV 1	9.24	11954.3	49398	3	Immunoglobulins	46.0037	90.0123
P04433	KV309_HUMAN	Ig kappa chain V III region VG Fragment OS Homo sapiens PE 1 SV 1	4.65	12689.2	13083.8	3	Immunoglobulins	81.7429	236.894
P04430	KV122_HUMAN	Ig kappa chain V I region BAN OS Homo sapiens PE 1 SV 1	8.72	11954.2	12277.3	2	Immunoglobulins	64.0206	123.976
P01609	KV117_HUMAN	Ig kappa chain V I region Scw OS Homo sapiens PE 1 SV 1	5.57	11878.1	44855.1	2	Immunoglobulins	59.2694	67.773
P02042	HBD_HUMAN	Hemoglobin subunit delta OS Homo sapiens GN HBD PE 1 SV 2	8.24	16169.6	23232.4	8	Other Plasma components	135.88	33.9089
P01611	KV119_HUMAN	Ig kappa chain V I region Wes OS Homo sapiens PE 1 SV 1	7.16	11722	22941.3	2	Immunoglobulins	148.639	169.002
P12273	PIP_HUMAN	Prolactin inducible protein OS Homo sapiens GN PIP PE 1 SV 1	8.1	16857.6	10760.5	6	Tissue Leakage	277.369	40.5748
P02735	SAA_HUMAN	Serum amyloid A protein OS Homo sapiens GN SAA1 PE 1 SV 2	6.35	13589.1	13653.6	4	Acute Phase	109.529	42.7816
P61224	RAP1B_HUMAN	Ras related protein Rap 1b OS Homo sapiens GN RAP1B PE 1 SV 1	5.46	21052.9	1694.3	4	Tissue Leakage	278.382	149.555
P04207	KV308_HUMAN	Ig kappa chain V III region CLL OS Homo sapiens PE 1 SV 2	8.83	14389.3	19300.3	3	Immunoglobulins	43.21	114.149
P31947	1433S_HUMAN	14 3 3 protein sigma OS Homo sapiens GN SFN PE 1 SV 1	4.48	27888.2	18940.3	4	Tissue Leakage	95.9776	99.2273
P01621	KV303_HUMAN	Ig kappa chain V III region NG9 Fragment OS Homo sapiens PE 1 SV 1	6.48	10842.9	46341.2	2	Immunoglobulins	31.0148	73.1146
P54652	HSP72_HUMAN	Heat shock related 70 kDa protein 2 OS Homo sapiens GN HSPA2 PE 1 SV 1	5.41	70306.2	9545.92	8	Tissue Leakage	297.973	233.719
P01701	LV103_HUMAN	Ig lambda chain V I region NEW OS Homo sapiens PE 1 SV 1	8.23	11566.8	942.141	2	Immunoglobulins	37.4495	71.8941
Q15166	PON3_HUMAN	Serum paraoxonase lactonase 3 OS Homo sapiens GN PON3 PE 1 SV 3	5.1	39835.7	1241.54	4	Lipoproteins	243.773	146.89
